# Supplementary material for: Artificial intelligence for X-ray scaphoid fracture detection: a systematic review and diagnostic test accuracy meta-analysis
Source: Springer Nature journal article supplement (doi:10.1007/s00330-023-10473-x), 2023-12-15
Supplement: MOESM1 [file 330_2023_10473_MOESM1_ESM.pdf]

Table S1: Included studies methodological and numerical data

| Study                   | Study Period                  | Imaging Modality | X-ray Exclusion Criteria                                                                                                                                                                                                                                  | Number of CNN Pipeline Steps | CNN Sub-Purpose                             | Number of Patients | X ray views; per patient                                                                                  | Number of Images | Type of Fracture                                                      | Standard of Reference for Diagnosis                                                                                                                                                                                                                                     | Human Comparison                                                                                                                |
|-------------------------|-------------------------------|------------------|-----------------------------------------------------------------------------------------------------------------------------------------------------------------------------------------------------------------------------------------------------------|------------------------------|---------------------------------------------|--------------------|-----------------------------------------------------------------------------------------------------------|------------------|-----------------------------------------------------------------------|-------------------------------------------------------------------------------------------------------------------------------------------------------------------------------------------------------------------------------------------------------------------------|---------------------------------------------------------------------------------------------------------------------------------|
| Langerhuizen et al [34] | NA                            | X-Ray            | Incomplete, distorted by cast or splint materials                                                                                                                                                                                                         | 1                            | Fracture Detection                          | 300                | 4<br>(AP, PA, Lateral, Oblique Projections)                                                               | 1200             | Visible Fracture = 127<br>Occult Fracture = 23<br>No Fracture = 150   | MRI-Confirmed or CT-Confirmed                                                                                                                                                                                                                                           | 5 Board-Certified Orthopedic Surgeons                                                                                           |
| Ozkaya et al [16]       | NA                            | X-Ray            | NA                                                                                                                                                                                                                                                        | 1                            | Fracture Detection                          | 390                | 1<br>(AP Projection)                                                                                      | 390              | Fracture = 192<br>No Fracture=198                                     | Follow up CT scans                                                                                                                                                                                                                                                      | 1 Emergency Doctor and 2 Orthopedic Hand Surgeons                                                                               |
| Yoon et al [35]         | January 2001 to December 2019 | X-Ray            | Poor quality, fractures older than 4 weeks, chronic hand conditions with bony changes around the scaphoid, psoriatic arthritis, rheumatoid arthritis, external immobilization (casts, splints, external fixations), hardware (screws, plates, wires, pins | 3                            | Scaphoid Segmentation Model                 | 4583               | Exact number per patient not elaborated<br>(PA or Scaphoid View)                                          | 11838            | NA                                                                    | A group of senior musculoskeletal radiologists provided final image interpretations. Radiographs with ambiguous or conflicting reports were reviewed by a hand surgeon. Final diagnoses were made based on the surgeon's interpretation. some cases had CT or MRI scans | NA                                                                                                                              |
|                         |                               |                  |                                                                                                                                                                                                                                                           |                              | Apparent Fracture Detection Model           | 4583               |                                                                                                           |                  | Fracture = 3991<br>No Fracture = 5542                                 |                                                                                                                                                                                                                                                                         |                                                                                                                                 |
|                         |                               |                  |                                                                                                                                                                                                                                                           |                              | Occult Fracture Detection Model             | 547                |                                                                                                           |                  | Occult Fracture = 139<br>No Fracture = 556                            |                                                                                                                                                                                                                                                                         |                                                                                                                                 |
|                         |                               |                  |                                                                                                                                                                                                                                                           |                              | Full Pipeline                               | NA                 |                                                                                                           |                  | Apparent Fracture = 904<br>Occult Fracture = 22<br>No Fracture = 1379 |                                                                                                                                                                                                                                                                         |                                                                                                                                 |
| Hendrix et al [36]      | 2017-2019                     | X-Ray            | Old scaphoid fractures, screws or other implants, resection, excessive damage or malformation, cast                                                                                                                                                       | 2                            | Scaphoid Segmentation                       | 775                | Exact number per patient not elaborated<br>(AP or PA Projections of Hand, Wrist and Scaphoid Radiographs) | 1039             | NA                                                                    | NA                                                                                                                                                                                                                                                                      | NA                                                                                                                              |
|                         | 2003-2019                     |                  |                                                                                                                                                                                                                                                           |                              | Fracture Detection                          | 1846               |                                                                                                           | 3000             | Fracture = 1165<br>No Fracture = 1835                                 | Original radiology reports. Dubious scaphoid fractures were reevaluated by a radiologist                                                                                                                                                                                | NA                                                                                                                              |
|                         | 2011-2020                     |                  |                                                                                                                                                                                                                                                           |                              | Full Pipeline                               | 190                |                                                                                                           | 190              | Fracture = 95<br>No Fracture = 95                                     | As Above and follow up CT scans                                                                                                                                                                                                                                         | 11 Radiologists, including: 3 residents, 6 Musculoskeletal (MSK) specialized senior Radiologists, 2 Non-MSK Senior radiologists |
| Tung et al [37]         | NA                            | X-Ray            | NA                                                                                                                                                                                                                                                        | 2                            | Scaphoid Segmentation<br>Fracture Detection | 154                | Wrist Radiographs (Frontal or Lateral)                                                                    | 356              | Fracture = 178<br>No Fracture = 178                                   | Radiology Report                                                                                                                                                                                                                                                        | NA                                                                                                                              |

|                        |           |       |                                                                                                                                                                                 |   |                                                                             |                        |                                                                                         |                                                                 |                   |                                                                                                                                                               |                                                                                                                                                                                                   |
|------------------------|-----------|-------|---------------------------------------------------------------------------------------------------------------------------------------------------------------------------------|---|-----------------------------------------------------------------------------|------------------------|-----------------------------------------------------------------------------------------|-----------------------------------------------------------------|-------------------|---------------------------------------------------------------------------------------------------------------------------------------------------------------|---------------------------------------------------------------------------------------------------------------------------------------------------------------------------------------------------|
| <b>Yang et al [38]</b> | NA        | X-Ray | NA                                                                                                                                                                              | 2 | Scaphoid Segmentation                                                       | 280                    | NA                                                                                      | 361                                                             | Fracture = 167    | Surgical Verification                                                                                                                                         | NA                                                                                                                                                                                                |
|                        |           |       |                                                                                                                                                                                 |   | Fracture Detection                                                          | 280                    |                                                                                         | 360                                                             | No Fracture = 194 |                                                                                                                                                               |                                                                                                                                                                                                   |
| <b>Li et al [2]</b>    | 2010-2020 | X-Ray | Poor quality, screw or other implants, tumors affecting wrist bones, tuberculous or rheumatoid arthritis                                                                        | 2 | Scaphoid Segmentation                                                       | 500                    | Wrist Radiographs (PA or Scaphoid View)                                                 | 930                                                             | Fracture = 513    | For Occult Fractures: 61 had follow up CT Scans 11 had follow up MRI Scans                                                                                    | Majority decision of 4 hand surgeons In case of no majority, a 5th hand surgeon joined to obtain majority                                                                                         |
|                        |           |       |                                                                                                                                                                                 |   |                                                                             | Apparent Fracture -170 |                                                                                         |                                                                 |                   |                                                                                                                                                               |                                                                                                                                                                                                   |
|                        |           |       |                                                                                                                                                                                 |   |                                                                             | Occult Fracture – 60   |                                                                                         |                                                                 |                   |                                                                                                                                                               |                                                                                                                                                                                                   |
|                        |           |       |                                                                                                                                                                                 |   |                                                                             | No Fracture –270       |                                                                                         |                                                                 |                   |                                                                                                                                                               |                                                                                                                                                                                                   |
|                        |           |       |                                                                                                                                                                                 |   | Fracture Detection                                                          | 100                    |                                                                                         | 209                                                             | No Fracture = 626 |                                                                                                                                                               |                                                                                                                                                                                                   |
|                        |           |       |                                                                                                                                                                                 |   |                                                                             | Apparent Fracture -38  |                                                                                         |                                                                 |                   |                                                                                                                                                               |                                                                                                                                                                                                   |
|                        |           |       |                                                                                                                                                                                 |   |                                                                             | Occult Fracture – 12   |                                                                                         |                                                                 |                   |                                                                                                                                                               |                                                                                                                                                                                                   |
|                        |           |       |                                                                                                                                                                                 |   | Full Pipeline                                                               | No Fracture – 50       |                                                                                         | 1139                                                            |                   |                                                                                                                                                               |                                                                                                                                                                                                   |
|                        |           |       |                                                                                                                                                                                 |   |                                                                             | 600                    |                                                                                         |                                                                 |                   |                                                                                                                                                               |                                                                                                                                                                                                   |
|                        |           |       |                                                                                                                                                                                 |   |                                                                             | Apparent Fracture -208 |                                                                                         |                                                                 |                   |                                                                                                                                                               |                                                                                                                                                                                                   |
| Occult Fracture - 72   |           |       |                                                                                                                                                                                 |   |                                                                             |                        |                                                                                         |                                                                 |                   |                                                                                                                                                               |                                                                                                                                                                                                   |
| Hendrix et al [39]     | 2003-2019 | X-Ray | Occlusion by casts, Occlusion by metallic osteosynthesis implants, Resection, not grown, unrecognizably deformed, non-acute fractures and severe scapholunate advanced collapse | 2 | Scaphoid Segmentation (Including laterality and x-ray projection detection) | 394                    | Hand, Wrist and Scaphoid Radiographs (AP/PA, Ulnar-deviated AP/PA, Oblique and Lateral) | 1117                                                            | NA                | 2 MSK-specialized radiologists. Cases were independently reviewed. Disagreements were resolved by consensus reading. Some cases had follow up CT or MRI scans | 5 experienced MSK radiologists with 5, 7, 22, 24 and 26 years of experience<br><br>Clinical Validation study: Interval between non-assisted radiograph reading and AI-assisted reading = 4 months |
|                        |           |       |                                                                                                                                                                                 |   | Fracture -NA                                                                |                        |                                                                                         |                                                                 |                   |                                                                                                                                                               |                                                                                                                                                                                                   |
|                        |           |       |                                                                                                                                                                                 |   | Fracture Detection                                                          | No Fracture -NA        |                                                                                         | 688 (different x-ray views) 219 Scaphoids (grouped by patients) | Fracture = 65     |                                                                                                                                                               |                                                                                                                                                                                                   |
|                        |           |       |                                                                                                                                                                                 |   |                                                                             | 209                    |                                                                                         |                                                                 |                   |                                                                                                                                                               |                                                                                                                                                                                                   |

|                         |           |       |                                                                                                                                           |                                                          |                                                         |                                                                               |                                                                                      |      |                         |                                                                                                         |                                                                                                                                                                                                                                                                                                                                                                                                                                                   |
|-------------------------|-----------|-------|-------------------------------------------------------------------------------------------------------------------------------------------|----------------------------------------------------------|---------------------------------------------------------|-------------------------------------------------------------------------------|--------------------------------------------------------------------------------------|------|-------------------------|---------------------------------------------------------------------------------------------------------|---------------------------------------------------------------------------------------------------------------------------------------------------------------------------------------------------------------------------------------------------------------------------------------------------------------------------------------------------------------------------------------------------------------------------------------------------|
| <b>Cohen et al [40]</b> | 2017-2019 | X-Ray | Braces or casts, technical limitations                                                                                                    | Commercially available AI system ("BoneView" by Gleamer) | Scaphoid Segmentation & Fracture Detection are integral | 637<br>Study tested for various wrist fractures, including scaphoid fractures | NA                                                                                   | 1917 | Scaphoid Fractures = 25 | 3 MSK-specialized radiologists with 5, 5 and 7 years of experience. Results were obtained by consensus. | Initial radiology results made by a total of 41 radiologists with various levels of experience, including: 29 residents (4th or 5th year of residency), 8 fellows in radiology, and 4 attendings.<br><br>Clinical Validation study<br>Comparison of diagnostic performance in 3 groups: AI, IRR & IRR+AI.<br>IRR+AI observation was considered positive when it was detected by either the AI or the IRR, regardless of the other's group result. |
| <b>Lee et al [41]</b>   | 2010-2020 | X-Ray | Anatomic variation, bone abnormality, except for fractures (for example - tumor), splint or cast, orthopedic hardware, poor image quality | 2 Parallel CNNs integrated to final result               | Scaphoid Segmentation<br><br>Fracture Detection         | 593<br>Study tested for various wrist fractures, including scaphoid fractures | Exact number per patient not elaborated.<br>Wrist Radiographs (AP, Lateral, Oblique) | 1186 | Scaphoid Fractures = 32 | 1 MSK-specialized radiologist and 1 orthopedic upper-limb surgeon; both with 19 years of experience.    | 2 radiologists:<br>2-year-fellowship-trained musculoskeletal radiologist<br>1-year-trained radiology resident<br><br>Clinical Validation study<br>Interval between non-assisted radiograph reading and AI-assisted reading = 3 weeks                                                                                                                                                                                                              |

NA = Not Available  
MSK =Musculoskeletal  
AI = Artificial Intelligence  
IRR = Initial Radiology Reports

Table S2: Included Studies artificial intelligence characteristics

| Study                   | Fracture Detection - CNN Architecture Type                                                                        | Scaphoid Segmentation                                                                                                                                                   | ROI or important region labeling       | Data Input proportion in training / validation / test                                                                                                                              | Augments                                                                                                                                                                                                                                |
|-------------------------|-------------------------------------------------------------------------------------------------------------------|-------------------------------------------------------------------------------------------------------------------------------------------------------------------------|----------------------------------------|------------------------------------------------------------------------------------------------------------------------------------------------------------------------------------|-----------------------------------------------------------------------------------------------------------------------------------------------------------------------------------------------------------------------------------------|
| Langerhuizen et al [34] | VGG16                                                                                                             | Rectangular ROI wrapping the scaphoid. Manually cropped and resized.                                                                                                    | NA                                     | Training - 180                                                                                                                                                                     | 10-fold augmentation of the training and validation set by using rotation (-15° and +15°), shifting of height and width (10%), zooming (between 0.8 and 1.1), and horizon flipping. The test set only composed of original radiographs. |
|                         |                                                                                                                   |                                                                                                                                                                         |                                        | Validation - 20                                                                                                                                                                    |                                                                                                                                                                                                                                         |
|                         |                                                                                                                   |                                                                                                                                                                         |                                        | Test - 100                                                                                                                                                                         |                                                                                                                                                                                                                                         |
| Ozkaya et al [16]       | ResNet50*                                                                                                         | Rectangular ROI wrapping the scaphoid. Marked by Expert radiologist                                                                                                     | NA                                     | Training - 203<br>Validation - 87<br>Test - 100                                                                                                                                    | NA                                                                                                                                                                                                                                      |
| Yoon et al [35]         | EfficientNetB3                                                                                                    | Scaphoid detection model based on Cascade Region-based Convolutional Neural Network; was trained and used to isolate the scaphoid in a bounding box in hand radiographs | Highlight important regions = Grad-CAM | Total Pipeline                                                                                                                                                                     | random flip, scale, random brightness, rotation (<15°), flip, resizing, and standardization.                                                                                                                                            |
|                         |                                                                                                                   |                                                                                                                                                                         |                                        | Training - 8356                                                                                                                                                                    |                                                                                                                                                                                                                                         |
|                         |                                                                                                                   |                                                                                                                                                                         |                                        | Validation - 1177                                                                                                                                                                  |                                                                                                                                                                                                                                         |
|                         |                                                                                                                   |                                                                                                                                                                         |                                        | Test - 2305                                                                                                                                                                        |                                                                                                                                                                                                                                         |
|                         |                                                                                                                   |                                                                                                                                                                         |                                        | Apparent Fracture Model                                                                                                                                                            |                                                                                                                                                                                                                                         |
|                         |                                                                                                                   |                                                                                                                                                                         |                                        | Training - 8306                                                                                                                                                                    |                                                                                                                                                                                                                                         |
|                         |                                                                                                                   |                                                                                                                                                                         |                                        | Validation - 1151                                                                                                                                                                  |                                                                                                                                                                                                                                         |
|                         |                                                                                                                   |                                                                                                                                                                         |                                        | Occult Fracture Model                                                                                                                                                              |                                                                                                                                                                                                                                         |
|                         |                                                                                                                   |                                                                                                                                                                         |                                        | Training - 565                                                                                                                                                                     |                                                                                                                                                                                                                                         |
| Validation - 130        |                                                                                                                   |                                                                                                                                                                         |                                        |                                                                                                                                                                                    |                                                                                                                                                                                                                                         |
| Hendrix et al [36]      | DenseNet-121                                                                                                      | "Segmentation CNN"                                                                                                                                                      | Highlight important regions = Grad-CAM | NA                                                                                                                                                                                 | Horizontal Flip, Image Shift, Bounding Box Shift, Scale, Rotate, Grid Distortion, Elastic Transform, Brightness, Contrast                                                                                                               |
| Tung et al [37]         | VGG16, VGG19, ResNet50, ResNet101, ResNet152, DenseNet121, DenseNet169, DenseNet201, Inception-V3, EfficientNetB0 | YOLOv4                                                                                                                                                                  | NA                                     | Training + Validation - 70%<br>Test - 30%                                                                                                                                          | Flip, Rotaion +/- 15                                                                                                                                                                                                                    |
| Yang et al [38]         | ResNet-152                                                                                                        | RCNN +ResNet50<br>Cascade R-CNN (Region-based Convolutional Neural Network) marked the fracture in a bounding box                                                       | NA                                     | NA                                                                                                                                                                                 | Contrast limited adaptive histogram equalization (CLAHE), Random horizontal flip with 50% probability, Random contrast with 50% probability                                                                                             |
| Li et al [2]            | MobileNetV3                                                                                                       | YOLOv3                                                                                                                                                                  | Highlight important regions = Grad-CAM | Training + Validation - 930<br>Test -209                                                                                                                                           | NA                                                                                                                                                                                                                                      |
| Hendrix et al [39]      | Inception-V3                                                                                                      | YOLOv5s                                                                                                                                                                 | NA                                     | Scaphoid localizer and laterality classifier:<br>Training + Validation – 12990<br>9% overlap with prior work by Hendrix et al [36]                                                 | Horizontal flipping<br>Rotation<br>Gaussian Noise                                                                                                                                                                                       |
|                         |                                                                                                                   |                                                                                                                                                                         |                                        | Scaphoid fracture detector:<br>Training + Validation – 4316<br>82% overlap with prior work by Hendrix et al [36]<br>Test – 688<br>5% overlap with prior work by Hendrix et al [36] |                                                                                                                                                                                                                                         |

|                         |                       |           |                                                                                                                                                                                                                            |                                                                                                                                                                            |                                                                                                               |
|-------------------------|-----------------------|-----------|----------------------------------------------------------------------------------------------------------------------------------------------------------------------------------------------------------------------------|----------------------------------------------------------------------------------------------------------------------------------------------------------------------------|---------------------------------------------------------------------------------------------------------------|
| <b>Cohen et al [40]</b> | Detectron 2 Framework | NA        | Zone of interest, integral to the AI system:<br>"solid line box" considered as a certain fracture with a high level of specificity<br>"dotted line box" considered as a probable fracture with a high level of sensitivity | "BoneView" by Gleamer (commercially available AI system)<br>60170 radiographs:<br>Training - 70%<br>Validation - 10%<br>Internal tests - 20%                               | NA                                                                                                            |
| <b>Lee et al [41]</b>   | NasNet                | RetinaNet | Heat Map                                                                                                                                                                                                                   | MURA dataset (public radiographic dataset) – 3791 for distal radius & ulnar styloid fractures<br><br>Hospital dataset – 641 for scaphoid fractures<br>validation set - 20% | Contrast limited adaptive histogram equalization (CLAHE)<br>Normalization<br>Histogram Matching<br>Sharpening |

\* Replaced the uppermost layers with a set of layers that performed two class classifications.

NA = Not Available

AI = Artificial Intelligence

Table S3: Included Studies Diagnostic Test Accuracy, and comparison to human performance

| Study                   | AI Fracture Diagnosis |                            |                         |             |             | Human Fracture Diagnosis            |          |                  |                 |                 |  |
|-------------------------|-----------------------|----------------------------|-------------------------|-------------|-------------|-------------------------------------|----------|------------------|-----------------|-----------------|--|
|                         | CNN                   | Accuracy                   | AUC                     | Sensitivity | Specificity | Experience                          | Accuracy | AUC              | Sensitivity     | Specificity     |  |
| Langerhuizen et al [34] | VGG16                 | 72.00%                     | 0.77                    | 84.0%       | 60.0%       | Board-Certified Orthopedic Surgeons | 84.0%    | NA               | 76.0%           | 93.0%           |  |
| Ozkaya et al [16]       | ResNet50*             | NA                         | 0.84                    | 76.0%       | 92.0%       | Experienced Orthopedic Surgeon      | NA       | 0.92             | 86.0%           | 98.0%           |  |
|                         |                       |                            |                         |             |             | Less Experienced Orthopedic Surgeon | NA       | 0.82             | 72.0%           | 92.0%           |  |
|                         |                       |                            |                         |             |             | Emergency Doctor                    | NA       | 0.76             | 62.0%           | 90.0%           |  |
| Yoon et al [35]         | EfficientNetB3        | NA                         | Total Pipeline          |             |             | NA                                  |          |                  |                 |                 |  |
|                         |                       |                            | X                       | 97.2%       | 66.0%       |                                     |          |                  |                 |                 |  |
|                         |                       |                            | Apparent Fracture Model |             |             |                                     |          |                  |                 |                 |  |
|                         |                       |                            | 0.955                   | 87.1%       | 92.1%       |                                     |          |                  |                 |                 |  |
| Hendrix et al [36]      | DenseNet-121          | NA                         | Fracture Detection      |             |             | NA                                  |          |                  |                 |                 |  |
|                         |                       |                            | 0.86                    | 66.0%       | 90.0%       |                                     |          |                  |                 |                 |  |
|                         |                       |                            | Entire System Test      |             |             |                                     |          |                  |                 |                 |  |
|                         |                       |                            | 0.87                    | 78.0%       | 84.0%       | Average of 11 Radiologists [Range]  | NA       | 0.83 [0.79-0.87] | NA [54.0-80.0%] | NA [75.0-95.0%] |  |
| Tung et al [37]         | Fracture Detection    |                            |                         |             |             | NA                                  |          |                  |                 |                 |  |
|                         | VGG 16                | 83.3%                      | 0.86                    | 86.1%       | 80.6%       |                                     |          |                  |                 |                 |  |
|                         | VGG19                 | 77.8%                      | 0.87                    | 83.3%       | 72.2%       |                                     |          |                  |                 |                 |  |
|                         | ResNet50              | 86.1%                      | 0.91                    | 88.9%       | 83.3%       |                                     |          |                  |                 |                 |  |
|                         | ResNet101             | 88.9%                      | 0.95                    | 88.9%       | 88.9%       |                                     |          |                  |                 |                 |  |
|                         | ResNet152             | 80.6%                      | 0.88                    | 80.6%       | 80.6%       |                                     |          |                  |                 |                 |  |
|                         | DenseNet121           | 87.5%                      | 0.93                    | 91.7%       | 83.3%       |                                     |          |                  |                 |                 |  |
|                         | DenseNet169           | 88.9%                      | 0.89                    | 91.7%       | 86.1%       |                                     |          |                  |                 |                 |  |
|                         | DenseNet201           | 90.3%                      | 0.91                    | 94.4%       | 86.1%       |                                     |          |                  |                 |                 |  |
|                         | Inception-V3          | 88.9%                      | 0.93                    | 88.9%       | 88.9%       |                                     |          |                  |                 |                 |  |
| EfficientNetB0          | 86.1%                 | 0.92                       | 94.4%                   | 77.8%       |             |                                     |          |                  |                 |                 |  |
| Yang et al [38]         | ResNet-152            | Detection of Fracture Area |                         |             | NA          |                                     |          |                  |                 |                 |  |
|                         |                       | 85.3%                      | 0.92                    | 78.9%       |             |                                     |          |                  |                 | 90.0%           |  |
|                         |                       | Fracture Detection         |                         |             |             |                                     |          |                  |                 |                 |  |
|                         |                       |                            | 82.9%                   | 0.917       | 73.5%       | 92.0%                               |          |                  |                 |                 |  |
| Li et al [2]            | MobileNetV3           | NA                         | 0.919                   | 82.0%       | 94.0%       | Majority between hand surgeons      | NA       | NA               | 76.0%           | 96.0%           |  |

|                           |                           |       |                                 |                                |       |                                                                       |       |      |               |               |
|---------------------------|---------------------------|-------|---------------------------------|--------------------------------|-------|-----------------------------------------------------------------------|-------|------|---------------|---------------|
| <b>Hendrix et al [39]</b> | Inception-V3              | NA    | All available X-ray projections |                                |       | Average of 5 MSK Radiologists<br>[Range]                              | NA    | 0.87 | [75.0%-83.0%] | [81.0%-94.0%] |
|                           |                           |       | 0.88                            | 72.0%                          | 93.0% |                                                                       |       |      |               |               |
|                           |                           |       | PA                              |                                |       |                                                                       |       |      |               |               |
|                           |                           |       | 0.79                            | 51.0%                          | 93.0% |                                                                       |       |      |               |               |
|                           |                           |       | PA + ulnar-deviated PA          |                                |       |                                                                       |       |      |               |               |
|                           |                           |       | 0.84                            | 59.0%                          | 93.0% |                                                                       |       |      |               |               |
|                           |                           |       | PA + oblique                    |                                |       |                                                                       |       |      |               |               |
| 0.85                      | 66.0%                     | 93.0% |                                 |                                |       |                                                                       |       |      |               |               |
| PA + lateral              |                           |       |                                 |                                |       |                                                                       |       |      |               |               |
| 0.83                      | 55.0%                     | 93.0% |                                 |                                |       |                                                                       |       |      |               |               |
| <b>Cohen et al [40]</b>   | "Bone View"<br>by Gleamer | NA    | NA                              | For scaphoid<br>subset = 84.0% | NA    | Initial Radiology Reports                                             | NA    | NA   | 80.0%         | NA            |
| <b>Lee et al [41]</b>     | NasNet                    | 74.0% | 0.81                            | 87.0%                          | 74.0% | 2-year-fellowship-trained<br>MSK radiologist<br>without AI assistance | 98.0% | 0.75 | 50.0%         | 99.0%         |
|                           |                           |       |                                 |                                |       | 2-year-fellowship-trained<br>MSK radiologist<br>with AI assistance    | 98.0% | 0.85 | 72.0%         | 98.0%         |
|                           |                           |       |                                 |                                |       | 1-year-trained radiology resident<br>without AI assistance            | 94.0% | 0.71 | 47.0%         | 96.0%         |
|                           |                           |       |                                 |                                |       | 1-year-trained radiology resident<br>with AI assistance               | 93.0% | 0.80 | 66.0%         | 94.0%         |

\* Replaced the uppermost layers with a set of layers that performed two class classifications.

NA = Not Available

MSK = Musculoskeletal

AI = Artificial Intelligence

Table S4: Key for stratification and grading of the included studies using the QUADAS-2 tool

|                           |                |                                                                                                                                                              |
|---------------------------|----------------|--------------------------------------------------------------------------------------------------------------------------------------------------------------|
| <b>Patient Selection</b>  | <b>High</b>    | Exclusion of "difficult to diagnose" cases, for example radiographs with casts.                                                                              |
|                           | <b>Unclear</b> | No specification of exclusion criteria.                                                                                                                      |
|                           | <b>Low</b>     | Full random sampling of eligible patients /radiographs.                                                                                                      |
| <b>Index Test</b>         | <b>Low</b>     | The AI systems are not aware of the "ground truth" results, so they were all deemed low.                                                                     |
| <b>Reference Standard</b> | <b>High</b>    | Not stated clearly if fractures and non-fractures were confirmed by either CT or MRI, or by expert/s.                                                        |
|                           | <b>Unclear</b> | Fractures and non-fractures were assessed by expert/s. Some cases or none, were confirmed by CT or MRI.                                                      |
|                           | <b>Low</b>     | Fractures and non-fractures were confirmed by either CT or MRI.                                                                                              |
| <b>Flow and Timing</b>    | <b>High</b>    | Clinical validation studies with a relatively short period of time (less than a month) between non-AI assisted readings, compared with AI-assisted readings. |
|                           | <b>Unclear</b> | Clinical validation studies with over a month time between non-AI assisted readings, compared with AI-assisted readings.                                     |
|                           | <b>Low</b>     | Studies without clinical validation, in which there is no need for an appropriate interval in between consecutive readings of radiographs.                   |
